# Supplementary material
Source: PubMed Central journal article supplement (PMC3255844)
Supplement: supp_86.2.919_FigS1.pdf [file supp_86.2.919_FigS1.pdf]

Supplementary figure 1

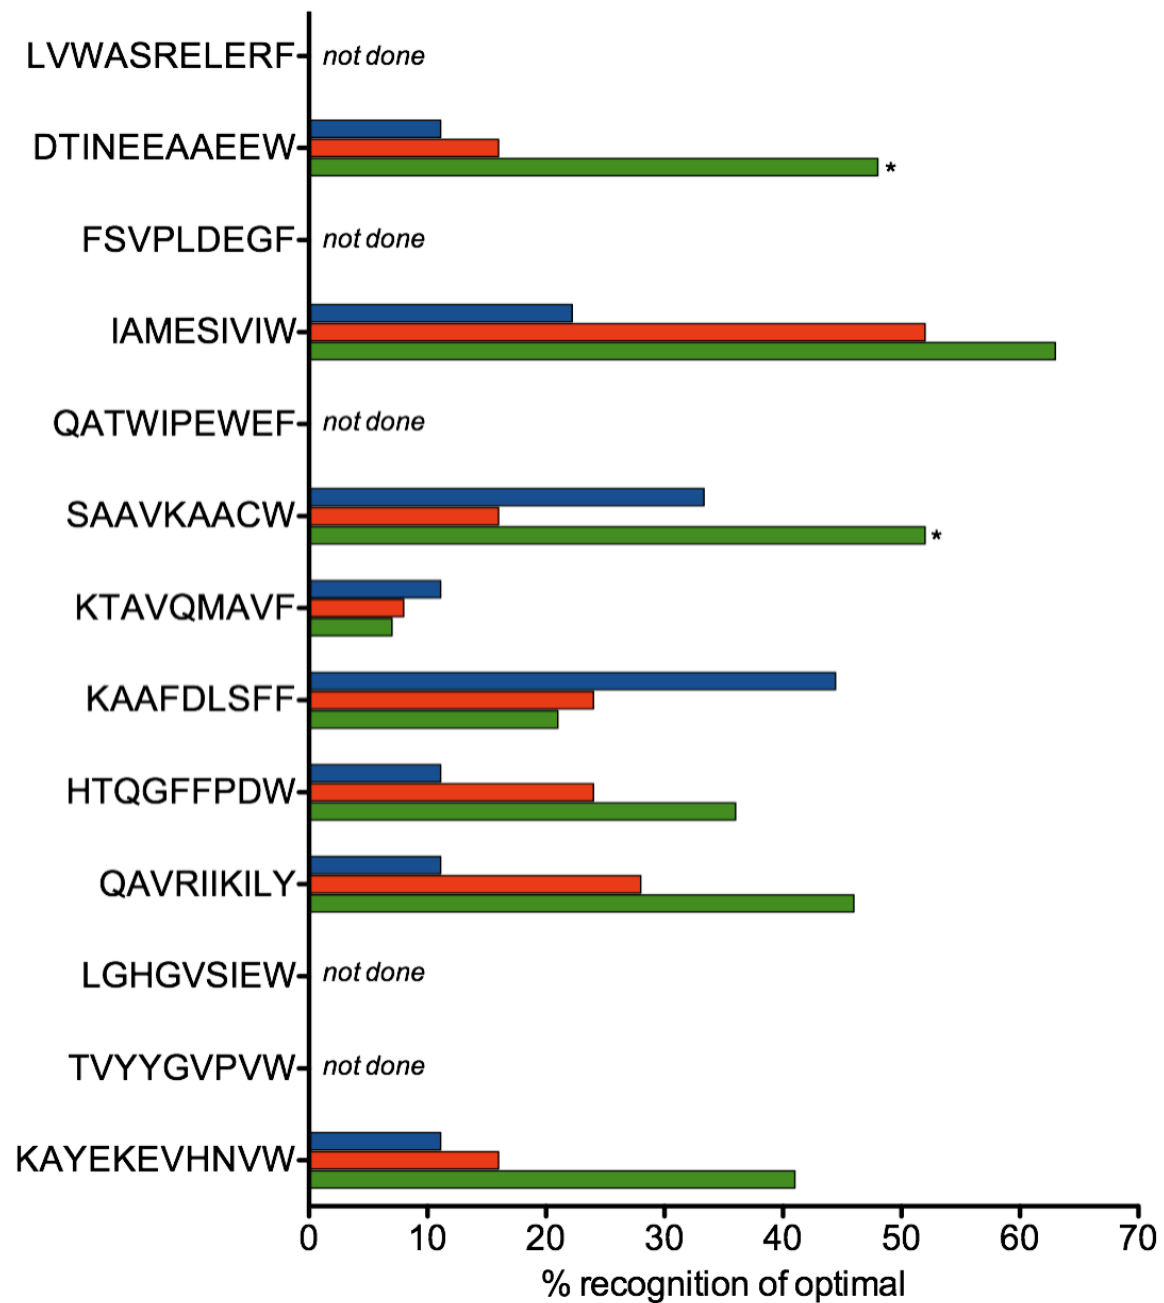

**Supplementary figure 1**

Optimal peptide recognition in HLA-B\*5702, B\*5703 and B\*5801 expressing individuals. IFN $\gamma$  elispot responses expressed as % responders (x-axis) to 8 optimal peptides shown on y-axis. Significant differences between HLA-B\*5703 and B\*5801 are indicated (Fisher's Exact test) (\*  $p < 0.01$ ).
